# Supplementary material for: Riparian Ecological Infrastructures: Potential for Biodiversity-Related Ecosystem Services in Mediterranean Human-Dominated Landscapes
Source: MDPI journal article supplement (doi:10.3390/su131910508), 2021-09-22
Supplement: s1 [file s1]

**Table S4** - Scoring assigned to herbaceous taxa for their suitability to seed dispersal by short-range dispersers (ants) based on dispersion mode and plant physiognomy, with references.

[illegible]

|                                                                   |    |    |   |    |   |     |  |   |           |
|-------------------------------------------------------------------|----|----|---|----|---|-----|--|---|-----------|
| <i>Conyza</i> sp.                                                 | 0* |    |   |    |   |     |  |   |           |
| <i>Dittrichia viscosa</i> (L.) Greuter                            | 0  |    |   |    |   |     |  |   |           |
| <i>Helichrysum stoechas</i> (L.) Moench<br>subsp. <i>stoechas</i> | 0* |    |   |    |   |     |  |   |           |
| <i>Lactuca serriola</i> L.                                        | 0  |    |   |    |   |     |  |   |           |
| <i>Sonchus asper</i> (L.) Hill                                    | 0  |    |   |    |   |     |  |   |           |
| <i>Xanthium strumarium</i> L.                                     | 0  |    |   |    | 0 |     |  |   |           |
| <b>Boraginaceae</b>                                               |    |    |   |    |   |     |  |   | 5 [2,7]   |
| <i>Anchusa azurea</i> Mill.                                       |    |    |   |    |   | 10  |  |   |           |
| <i>Echium</i> sp.                                                 |    | 0  | 0 | 0* |   |     |  |   |           |
| <b>Brassicaceae</b>                                               |    |    |   |    |   |     |  |   | 0 [2,3,8] |
| <i>Brassica</i> sp.                                               |    | 0* |   |    |   |     |  |   |           |
| <i>Hirschfeldia incana</i> (L.) Lagr.-Foss.                       |    | 0  |   |    |   |     |  |   |           |
| <i>Raphanus raphanistrum</i> L. subsp.<br><i>raphanistrum</i>     |    |    |   |    |   | 8** |  |   |           |
| <b>Cactaceae</b>                                                  |    |    |   |    |   |     |  |   | 2 [3,9]   |
| <i>Opuntia ficus-indica</i> (L.) Mill.                            |    |    |   |    | 2 |     |  |   |           |
| <b>Campanulaceae</b>                                              |    |    |   |    |   |     |  |   | 0 [2,10]  |
| <i>Jasione montana</i> L.                                         |    |    |   | 0  |   |     |  |   |           |
| <i>Lobelia urens</i> L.                                           |    | 0  |   |    |   |     |  |   |           |
| <b>Caprifoliaceae</b>                                             |    |    |   |    |   |     |  |   | 2 [3,10]  |
| <i>Lonicera periclymenum</i> L.                                   |    |    |   |    | 2 |     |  |   |           |
| <b>Commelinaceae</b>                                              |    |    |   |    |   |     |  |   | 0 [3]     |
| <i>Tradescantia fluminensis</i> Vell.                             |    | 0  |   |    |   |     |  | 0 |           |
| <b>Convolvulaceae</b>                                             |    |    |   |    |   |     |  |   | 2 [2,3]   |
| <i>Calystegia</i> sp.                                             |    |    |   | 0* |   |     |  |   |           |
| <i>Convolvulus arvensis</i> L.                                    |    | 0  | 0 |    | 2 |     |  |   |           |
| <i>Cuscuta</i> sp.                                                | 0* |    |   |    | 2 |     |  |   |           |

|                                                |    |   |    |    |   |      |  |    |           |
|------------------------------------------------|----|---|----|----|---|------|--|----|-----------|
| <i>Cucurbitaceae</i>                           |    |   |    |    |   |      |  | 2  | [3]       |
| <i>Bryonia dioica</i> Jacq.                    |    |   |    |    | 2 |      |  |    |           |
| <i>Euphorbiaceae</i>                           |    |   |    |    |   |      |  | 10 | [2,7]     |
| <i>Euphorbia</i> sp.                           |    |   |    |    |   | 10   |  |    |           |
| <i>Fabaceae</i>                                |    |   |    |    |   |      |  | 2  | [2,11]    |
| <i>Lotus pedunculatus</i> Cav.                 | 0* |   |    |    |   |      |  |    |           |
| <i>Lupinus</i> sp.                             | 0  |   | 0  |    | 2 |      |  |    |           |
| <i>Trifolium</i> sp.                           | 0  |   | 0* |    | 2 | 6*** |  |    |           |
| <i>Gentianaceae</i>                            |    |   |    |    |   |      |  | 0  | [3]       |
| <i>Centaurium</i> sp.                          | 0* |   |    |    |   |      |  |    |           |
| <i>Geraniaceae</i>                             |    |   |    |    |   |      |  | 0  | [2]       |
| <i>Geranium</i> sp.                            | 0  |   | 0* |    |   |      |  |    |           |
| <i>Hypericaceae</i>                            |    |   |    |    |   |      |  | 0  | [2]       |
| <i>Hypericum</i> sp.                           | 0* |   |    |    |   |      |  |    |           |
| <i>Iridaceae</i>                               |    |   |    |    |   |      |  | 0  | [2]       |
| <i>Iris pseudacorus</i> L.                     | 0  |   |    |    |   |      |  |    |           |
| <i>Juncaceae / Cyperaceae</i>                  |    |   |    |    |   |      |  | 0  | [2,11]    |
| <i>Cyperus alterniflorus</i> R.Br.             |    |   |    | 0* |   |      |  |    |           |
| <i>Cyperus eragrostis</i> Lam.                 |    |   |    | 0* |   |      |  |    |           |
| <i>Cyperus longus</i> L.                       |    |   |    | 0* |   |      |  |    |           |
| <i>Juncus effusus</i> L. subsp. <i>effusus</i> | 0  | 0 |    | 0  |   | 6*** |  |    |           |
| <i>Scirpoides holoschoenus</i> (L.) Soják      |    |   |    |    | 2 |      |  |    |           |
| <i>Lamiaceae</i>                               |    |   |    |    |   |      |  | 0  | [7,11-13] |
| <i>Lavandula</i> sp.                           |    |   |    |    |   | 6*** |  |    |           |
| <i>Lycopus europaeus</i> L.                    |    |   |    |    | 2 |      |  |    |           |
| <i>Mentha pulegium</i> L.                      | 0* |   |    |    |   |      |  |    |           |
| <i>Mentha</i> sp.                              | 0* |   |    |    |   |      |  |    |           |

|                                             |    |    |  |    |    |  |      |   |                |
|---------------------------------------------|----|----|--|----|----|--|------|---|----------------|
| <i>Prunella vulgaris</i> L.                 |    | 0  |  |    |    |  |      |   |                |
| <i>Stachys arvensis</i> (L.) L.             |    | 0  |  |    |    |  | 0    |   |                |
| <i>Liliaceae</i>                            |    |    |  |    |    |  |      | 0 | [2]            |
| <i>Lilium</i> sp.                           | 0* | 0  |  |    |    |  |      |   |                |
| <i>Lythraceae</i>                           |    |    |  |    |    |  |      | 0 | [2,3]          |
| <i>Lythrum junceum</i> Banks & Sol.         |    | 0* |  |    | 0  |  |      |   |                |
| <i>Lythrum salicaria</i> L.                 |    |    |  |    | 0  |  |      |   |                |
| <i>Lythrum</i> sp.                          |    | 0* |  |    | 0* |  |      |   |                |
| <i>Malvaceae</i>                            |    |    |  |    |    |  |      | 0 | [2]            |
| <i>Malva</i> sp.                            | 0  | 0* |  |    |    |  |      |   |                |
| <i>Onagraceae</i>                           |    |    |  |    |    |  |      | 0 | [2,3]          |
| <i>Oenothera</i> sp.                        | 0* |    |  |    |    |  |      |   |                |
| <i>Papaveraceae</i>                         |    |    |  |    |    |  |      | 4 | [1,2]          |
| <i>Fumaria</i> sp.                          |    |    |  |    |    |  | 8*   |   |                |
| <i>Papaver</i> sp.                          | 0* | 0  |  |    |    |  |      |   |                |
| <i>Phytolaccaceae</i>                       |    |    |  |    |    |  |      | 2 | [3]            |
| <i>Phytolacca americana</i> L.              |    |    |  |    | 2  |  |      |   |                |
| <i>Plantaginaceae</i>                       |    |    |  |    |    |  |      | 6 | [2,3,14,15]    |
| <i>Anarrhinum bellidifolium</i> (L.) Willd. |    | 0  |  |    | 0  |  |      |   |                |
| <i>Digitalis purpurea</i> L.                | 0  |    |  |    |    |  |      |   |                |
| <i>Plantago major</i> L.                    |    |    |  |    | 2  |  | 6*** |   |                |
| <i>Veronica anagallis-aquatica</i> L.       |    | 0* |  | 0* |    |  | 8*   |   |                |
| <i>Poaceae</i>                              |    |    |  |    |    |  |      | 0 | [2,3,14,16,17] |
| <i>Arundo donax</i> L.                      | 0  |    |  |    |    |  |      |   |                |
| <i>Molinia caerulea</i> (L.) Moench         | 0  |    |  |    |    |  |      |   |                |
| <i>Paspalum distichum</i> L.                | 0* |    |  | 0* |    |  |      |   |                |

|                                                               |   |  |    |   |    |    |    |          |
|---------------------------------------------------------------|---|--|----|---|----|----|----|----------|
| <i>Phragmites australis</i> (Cav.) Trin<br>ex.Steud.          |   |  |    |   | 2  |    |    |          |
| <i>Sorghum</i> sp.                                            |   |  | 0* |   |    |    |    |          |
| <i>Polygonaceae</i>                                           |   |  |    |   |    |    | 2  | [2,3,11] |
| <i>Polygonum hydropiper</i> L.                                |   |  |    | 0 |    |    |    |          |
| <i>Polygonum lapathifolium</i> L.                             | 0 |  |    |   | 2  |    |    |          |
| <i>Rumex</i> sp.                                              |   |  |    |   |    | 8* |    |          |
| <i>Portulacaceae</i>                                          |   |  |    |   |    |    | 10 | [1]      |
| <i>Portulaca oleracea</i> L.                                  |   |  |    |   |    | 10 |    |          |
| <i>Primulaceae</i>                                            |   |  |    |   |    |    | 0  | [2]      |
| <i>Lysimachia vulgaris</i> L.                                 | 0 |  |    |   |    |    |    |          |
| <i>Rosaceae</i>                                               |   |  |    |   |    |    | 2  | [3]      |
| <i>Agrimonia</i> sp.                                          |   |  |    |   | 2  |    |    |          |
| <i>Rubiaceae</i>                                              |   |  |    |   |    |    | 0  | [2]      |
| <i>Galium</i> sp.                                             | 0 |  | 0  |   |    |    |    |          |
| <i>Santalaceae</i>                                            |   |  |    |   |    |    | 2  | [3]      |
| <i>Osyris alba</i> L.                                         |   |  |    |   | 2  |    |    |          |
| <i>Scrophulariaceae</i>                                       |   |  |    |   |    |    | 0  | [2,18]   |
| <i>Scrophularia auriculata</i> L. subsp.<br><i>auriculata</i> |   |  |    |   | 2  |    |    |          |
| <i>Solanaceae</i>                                             |   |  |    |   |    |    | 2  | [3,7]    |
| <i>Datura stramonium</i> L.                                   | 0 |  |    |   |    | 10 |    |          |
| <i>Solanum nigrum</i> L.                                      |   |  |    |   | 2  |    |    |          |
| <i>Solanum sublobatum</i> Roem. &<br>Sult.                    |   |  |    |   | 2* |    |    |          |
| <i>Solanum</i> sp.                                            |   |  |    |   | 2  |    |    |          |
| <i>Thymelaeaceae</i>                                          |   |  |    |   |    |    | 2  | [3]      |
| <i>Daphne gnidium</i> L.                                      |   |  |    |   | 2  |    |    |          |

|                              |    |    |   |    |  |  |  |   |        |
|------------------------------|----|----|---|----|--|--|--|---|--------|
| <i>Typhaceae</i>             |    |    |   |    |  |  |  | 0 | [2,19] |
| <i>Sparganium erectum</i> L. |    |    |   | 0  |  |  |  |   |        |
| <i>Sparganium</i> sp.        |    |    |   | 0  |  |  |  |   |        |
| <i>Typha</i> sp.             | 0* |    |   |    |  |  |  |   |        |
| <i>Urticaceae</i>            |    |    |   |    |  |  |  | 0 | [3]    |
| <i>Parietaria judaica</i> L. |    |    | 0 |    |  |  |  |   |        |
| <i>Urtica</i> sp.            | 0  |    |   | 0* |  |  |  |   |        |
| <i>Xanthorrhoeaceae</i>      |    |    |   |    |  |  |  | 0 | [2]    |
| <i>Asphodelus</i> sp.        | 0  | 0* |   |    |  |  |  |   |        |

\*on species from the same genus

\*\*species dispersed by ants

\*\*\*species from the same genus dispersed by ants

## References:

1. Li Vigni, I.; Melati, M. R. Examples of seed dispersal by entomochory. *Acta Botanica Gallica* **1999**, 146(2), 145–156. <https://doi.org/10.1080/12538078.1999.10515813>
2. Tavsanoğlu, Ç.; Pausas, J.G. A functional trait database for Mediterranean Basin plants. *Scientific Data* **2018** 5:180135.
3. Royal Botanic Gardens Kew. (2021) Seed Information Database (SID). Version 7.1. Available from: <http://data.kew.org/sid/> (August 2021) (last accessed: 11/08/2021)
4. [https://nas.er.usgs.gov/queries/GreatLakes/FactSheet.aspx?Species\\_ID=2669](https://nas.er.usgs.gov/queries/GreatLakes/FactSheet.aspx?Species_ID=2669) (last accessed: 06/08/2021)
5. <https://www.fs.fed.us/database/feis/plants/vine/vinspp/all.html#Seed%20dispersal> (last accessed: 05/08/2021)
6. Barroso, Á.; Amor, F.; Cerdá, X.; Boulay, R. R. Dispersal of non-myrmecochorous plants by a “keystone disperser” ant in a Mediterranean habitat reveals asymmetric interdependence. *Insectes Sociaux* **2013**, 60(1), 75–86. <https://doi.org/10.1007/s00040-012-0268-0>
7. Lengyel, S.; Gove, A. D.; Latimer, A. M.; Majer, J. D.; Dunn, R. R. Convergent evolution of seed dispersal by ants, and phylogeny and biogeography in flowering plants: A global survey. *Perspectives in Plant Ecology, Evolution and Systematics* **2010**, 12(1), 43–55. <https://doi.org/10.1016/j.ppees.2009.08.001>
8. Minkey, D. M.; Spafford, H. Removal and Burial of Weed Seeds by Ants (*Hymenoptera: Formicidae*) From the Soil Surface of a Cropped Area in Western Australia, *Environmental Entomology* **2016**, Volume 45, Issue 5, October 2016, Pages 1199–1204, <https://doi.org/10.1093/ee/nvw093>
9. Schlumpberger, B. O.; Badano, E. I. Diversity of floral visitors to *Echinopsis atacamensis* subsp. *pascana* (*Cactaceae*). *Haseltonia* **2005**, (11), 18–26. [https://doi.org/10.2985/1070-0048\(2005\)11\[18:DOFVTE\]2.0.CO;2](https://doi.org/10.2985/1070-0048(2005)11[18:DOFVTE]2.0.CO;2)
10. Aguiar, F.C.; Fabião, A.M.; Bejarano, M.D.; Merritt, D.; Nilsson, C.; Martins, M.J. (2013) FLOWBASE – a riparian plant traitbase (<http://www.isa.ulisboa.pt/proj/flowbase/>). Centro de Estudos Florestais, Instituto Superior de Agronomia, Universidade de Lisboa, Lisboa, Portugal.

11. Azcárate, F. M.; Arqueros, L.; Sánchez, A. M.; Peco, B. Seed and fruit selection by harvester ants, *Messor barbarus*, in Mediterranean grassland and scrubland. *Functional Ecology* **2005**, 19(2), 273–283. <https://doi.org/10.1111/j.0269-8463.2005.00956.x>
12. <https://nas.er.usgs.gov/queries/FactSheet.aspx?SpeciesID=2694> (last accessed: 05/08/2021)
13. <https://www.cabi.org/isc/datasheet/116556> (last accessed: 05/08/2021)
14. Detrain, C.; Tasse, O. Seed drops and caches by the harvester ant *Messor barbarus*: Do they contribute to seed dispersal in Mediterranean grasslands? *Naturwissenschaften* **2000**, 87(8), 373–376. <https://doi.org/10.1007/s001140050744>
15. Peters, M.; Oberrath, R.; Böhning-Gaese, K. Seed dispersal by ants: Are seed preferences influenced by foraging strategies or historical constraints? *Flora* **2003**, 198(6), 413–420. <https://doi.org/10.1078/0367-2530-1210114>
16. Hensen, I. Seed predation by ants in south-eastern Spain (Desierto de Tabernas, Almería). *Anales de Biología* **2002**, (24), 89–96.
17. Jacquemyn, H.; Brys, R.; Neubert, M. G. Fire increases invasive spread of *Molinia caerulea* mainly through changes in demographic parameters. *Ecological Applications* **2005**, 15(6), 2097–2108. <https://doi.org/10.1890/04-1762>
18. <https://dengarden.com/gardening/Why-Do-Snapdragons-Come-Back-Each-Season-in-Different-Colors> (last accessed: 05/08/2021)
19. Kim, S. H.; Nam, J. M.; Kim, J. G. Establishment strategy of a rare wetland species *Sparganium erectum* in Korea. *Journal of Ecology and Environment* **2017**, 41(1), 1–11. <https://doi.org/10.1186/s41610-017-0045-0>
