# Supplementary material for: Riparian Ecological Infrastructures: Potential for Biodiversity-Related Ecosystem Services in Mediterranean Human-Dominated Landscapes
Source: MDPI journal article supplement (doi:10.3390/su131910508), 2021-09-22
Supplement: s1 [file s1]

**Table S10** - Scoring assigned to herbaceous taxa for their suitability to seed dispersal by long-range dispersers (birds and non-flying small mammals) based on dispersion mode, with references.

| Herbaceous family/taxa                                         | Dispersion mode |           |               |              |             |            | Score | References |
|----------------------------------------------------------------|-----------------|-----------|---------------|--------------|-------------|------------|-------|------------|
|                                                                | Anemochory      | Autochory | Ballistochory | Endozoochory | Exozoochory | Hydrochory |       |            |
| <i>Amaranthaceae</i>                                           |                 |           |               |              |             |            | 4     | [5]        |
| <i>Chenopodium album</i> L.                                    |                 | 0         |               | 4**          |             |            |       |            |
| <i>Amaryllidaceae</i>                                          |                 |           |               |              |             |            | 0     | [1]        |
| <i>Allium</i> sp.                                              |                 |           |               |              |             |            | 0     |            |
| <i>Apiaceae</i>                                                |                 |           |               |              |             |            | 0     | [2]        |
| <i>Apium nodiflorum</i> (L.) Lag.                              |                 | 0         |               |              |             |            |       |            |
| <i>Conium maculatum</i> L.                                     | 0               |           |               |              | 0           | 0          |       |            |
| <i>Daucus carota</i> L.                                        | 0               |           |               |              | 0           |            |       |            |
| <i>Daucus</i> sp.                                              | 0*              |           |               |              | 0*          |            |       |            |
| <i>Foeniculum vulgare</i> Mill.                                |                 | 0         | 0             | 4**          |             |            |       |            |
| <i>Apocynaceae</i>                                             |                 |           |               |              |             |            | 0     | [3,4]      |
| <i>Vinca difformis</i> Pourr. subsp. <i>difformis</i>          |                 | 0*        |               |              |             |            | 0*    |            |
| <i>Araceae</i>                                                 |                 |           |               |              |             |            | 10    | [3]        |
| <i>Arum italicum</i> Mill. subsp. <i>italicum</i>              |                 |           |               | 10           |             |            |       |            |
| <i>Asteraceae</i>                                              |                 |           |               |              |             |            | 0     | [3,5]      |
| <i>Andryala integrifolia</i> L.                                |                 | 0         |               |              |             |            |       |            |
| <i>Arctium minus</i> Bernh.                                    |                 |           |               |              | 0           |            |       |            |
| <i>Aster squamatus</i> (Spreng.) Hieron.                       | 0*              |           |               |              |             |            |       |            |
| <i>Bidens frondosa</i> L.                                      |                 |           |               |              | 0           |            |       |            |
| <i>Carlina racemosa</i> L.                                     | 0*              |           |               |              |             |            |       |            |
| <i>Chondrilla juncea</i> L.                                    | 0               |           |               |              |             |            |       |            |
| <i>Conyza</i> sp.                                              | 0*              |           |               |              |             |            |       |            |
| <i>Dittrichia viscosa</i> (L.) Greuter                         | 0               |           |               |              |             |            |       |            |
| <i>Helichrysum stoechas</i> (L.) Moench subsp. <i>stoechas</i> | 0               |           |               |              |             |            |       |            |
| <i>Lactuca serriola</i> L.                                     | 0               |           |               |              |             |            |       |            |
| <i>Sonchus asper</i> (L.) Hill                                 | 0               |           |               |              |             |            |       |            |
| <i>Xanthium strumarium</i> L.                                  | 0               |           |               |              | 0           | 0          |       |            |
| <i>Boraginaceae</i>                                            |                 |           |               |              |             |            | 0     | [3,6]      |
| <i>Anchusa azurea</i> Mill.                                    |                 |           |               |              |             |            | 0     |            |

|                                                            |    |   |      |    |    |    |         |
|------------------------------------------------------------|----|---|------|----|----|----|---------|
| <i>Echium</i> sp.                                          | 0  | 0 |      | 0* |    |    |         |
| <b>Brassicaceae</b>                                        |    |   |      |    |    | 0  | [3,5,7] |
| <i>Brassica</i> sp.                                        | 0* |   |      |    |    |    |         |
| <i>Hirschfeldia incana</i> (L.) Lagr.-Foss.                | 0  |   |      |    |    |    |         |
| <i>Raphanus raphanistrum</i> L. subsp. <i>raphanistrum</i> | 0  |   | 4**  |    | 0  | 0  |         |
| <b>Cactaceae</b>                                           |    |   |      |    |    | 10 | [5,8]   |
| <i>Opuntia ficus-indica</i> (L.) Mill.                     |    |   | 10   |    |    |    |         |
| <b>Campanulaceae</b>                                       |    |   |      |    |    | 0  | [3,9]   |
| <i>Jasione montana</i> L.                                  |    |   |      |    | 0  |    |         |
| <i>Lobelia urens</i> L.                                    | 0  |   |      |    |    |    |         |
| <b>Caprifoliaceae</b>                                      |    |   |      |    |    | 10 | [5,9]   |
| <i>Lonicera periclymenum</i> L.                            |    |   | 10   |    |    |    |         |
| <b>Commelinaceae</b>                                       |    |   |      |    |    | 0  | [5]     |
| <i>Tradescantia fluminensis</i> Vell.                      | 0  |   |      |    |    |    |         |
| <b>Convolvulaceae</b>                                      |    |   |      |    |    | 2  | [3,5]   |
| <i>Calystegia</i> sp.                                      |    |   |      |    | 0* |    |         |
| <i>Convolvulus arvensis</i> L.                             | 0  | 0 | 4**  |    |    |    |         |
| <i>Cuscuta</i> sp.                                         | 0* |   | 2*** |    |    |    |         |
| <b>Cucurbitaceae</b>                                       |    |   |      |    |    | 10 | [5]     |
| <i>Bryonia dioica</i> Jacq.                                |    |   | 10   |    |    |    |         |
| <b>Euphorbiaceae</b>                                       |    |   |      |    |    | 0  | [3,6]   |
| <i>Euphorbia</i> sp.                                       |    |   |      |    |    | 0* |         |
| <b>Fabaceae</b>                                            |    |   |      |    |    | 2  | [3,10]  |
| <i>Lotus pedunculatus</i> Cav.                             | 0* |   |      |    |    |    |         |
| <i>Lupinus</i> sp.                                         | 0  |   | 2*** | 0  |    | 0  |         |
| <i>Trifolium</i> sp.                                       | 0  |   | 2*** | 0* |    | 0  |         |
| <b>Gentianaceae</b>                                        |    |   |      |    |    | 0  | [5]     |
| <i>Centaureum</i> sp.                                      | 0* |   |      |    |    |    |         |
| <b>Geraniaceae</b>                                         |    |   |      |    |    | 0  | [3]     |
| <i>Geranium</i> sp.                                        | 0  |   |      | 0* |    |    |         |
| <b>Hypericaceae</b>                                        |    |   |      |    |    | 0  | [3]     |
| <i>Hypericum</i> sp.                                       | 0* |   |      |    |    |    |         |
| <b>Iridaceae</b>                                           |    |   |      |    |    | 0  | [3]     |
| <i>Iris pseudacorus</i> L.                                 | 0  |   |      |    |    |    |         |

|                                                |    |    |     |    |    |    |              |
|------------------------------------------------|----|----|-----|----|----|----|--------------|
| <i>Juncaceae / Cyperaceae</i>                  |    |    |     |    |    | 0  | [3,10,11]    |
| <i>Cyperus alterniflorus</i> R.Br.             |    |    |     |    | 0* |    |              |
| <i>Cyperus eragrostis</i> Lam.                 |    |    |     |    | 0* |    |              |
| <i>Cyperus longus</i> L.                       |    |    |     |    | 0* |    |              |
| <i>Juncus effusus</i> L. subsp. <i>effusus</i> | 0  | 0  |     |    | 0  | 0  |              |
| <i>Scirpoides holoschoenus</i> (L.) Soják      |    |    | 4** |    |    |    |              |
| <i>Lamiaceae</i>                               |    |    |     |    |    | 0  | [6,10,12,13] |
| <i>Lavandula</i> sp.                           |    |    |     |    |    | 0  |              |
| <i>Lycopus europaeus</i> L.                    |    |    | 4** |    | 0  |    |              |
| <i>Mentha pulegium</i> L.                      |    | 0* |     |    |    |    |              |
| <i>Mentha</i> sp.                              |    | 0* |     |    |    |    |              |
| <i>Prunella vulgaris</i> L.                    |    | 0  |     | 0  |    |    |              |
| <i>Stachys arvensis</i> (L.) L.                |    | 0  |     |    |    |    |              |
| <i>Liliaceae</i>                               |    |    |     |    |    | 0  | [3]          |
| <i>Lilium</i> sp.                              | 0* | 0  |     |    |    |    |              |
| <i>Lythraceae</i>                              |    |    |     |    |    | 0  | [3,5]        |
| <i>Lythrum junceum</i> Banks & Sol.            |    | 0* |     |    | 0  |    |              |
| <i>Lythrum salicaria</i> L.                    |    |    |     |    | 0  |    |              |
| <i>Lythrum</i> sp.                             |    | 0* |     |    | 0* |    |              |
| <i>Malvaceae</i>                               |    |    |     |    |    | 0  | [3]          |
| <i>Malva</i> sp.                               |    | 0* |     |    |    |    |              |
| <i>Onagraceae</i>                              |    |    |     |    |    | 0  | [3,5]        |
| <i>Oenothera</i> sp.                           | 0* |    |     |    |    |    |              |
| <i>Papaveraceae</i>                            |    |    |     |    |    | 0  | [1,3]        |
| <i>Fumaria</i> sp.                             |    |    |     |    |    | 0  |              |
| <i>Papaver</i> sp.                             | 0* | 0  |     |    |    |    |              |
| <i>Phytolaccaceae</i>                          |    |    |     |    |    | 10 | [5]          |
| <i>Phytolacca americana</i> L.                 |    |    | 10  |    |    |    |              |
| <i>Plantaginaceae</i>                          |    |    |     |    |    | 0  | [3,5,14]     |
| <i>Anarrhinum bellidifolium</i> (L.) Willd.    |    | 0  |     |    | 0  |    |              |
| <i>Digitalis purpurea</i> L.                   | 0  |    |     |    |    |    |              |
| <i>Plantago major</i> L.                       |    | 0  | 4** |    |    | 0  |              |
| <i>Veronica anagallis-aquatica</i> L.          |    | 0* |     | 0* |    | 0* |              |
| <i>Poaceae</i>                                 |    |    |     |    |    | 0  | [3,5,14-16]  |

|                                                            |    |   |  |     |    |    |          |
|------------------------------------------------------------|----|---|--|-----|----|----|----------|
| <i>Arundo donax</i> L.                                     | 0  |   |  |     |    |    |          |
| <i>Molinia caerulea</i> (L.) Moench                        | 0  |   |  |     |    |    |          |
| <i>Paspalum distichum</i> L.                               | 0* |   |  |     | 0* |    |          |
| <i>Phragmites australis</i> (Cav.) Trin ex.Steud.          |    | 0 |  | 4** |    | 0  |          |
| <i>Sorghum</i> sp.                                         |    |   |  |     | 0* |    |          |
| <b>Polygonaceae</b>                                        |    |   |  |     |    | 0  | [3,5,10] |
| <i>Polygonum hydropiper</i> L.                             |    |   |  |     |    | 0  |          |
| <i>Polygonum lapathifolium</i> L.                          |    | 0 |  | 4** |    |    |          |
| <i>Rumex</i> sp.                                           |    |   |  |     |    | 0  |          |
| <b>Portulacaceae</b>                                       |    |   |  |     |    | 0  | [1]      |
| <i>Portulaca oleracea</i> L.                               |    |   |  |     |    | 0  |          |
| <b>Primulaceae</b>                                         |    |   |  |     |    | 0  | [3]      |
| <i>Lysimachia vulgaris</i> L.                              |    | 0 |  |     |    |    |          |
| <b>Rosaceae</b>                                            |    |   |  |     |    | 10 | [5]      |
| <i>Agrimonia</i> sp.                                       |    |   |  | 10  |    |    |          |
| <b>Rubiaceae</b>                                           |    |   |  |     |    | 0  | [3]      |
| <i>Galium</i> sp.                                          |    | 0 |  |     | 0* |    |          |
| <b>Santalaceae</b>                                         |    |   |  |     |    | 10 | [5]      |
| <i>Osiris alba</i> L.                                      |    |   |  | 10  |    |    |          |
| <b>Scrophulariaceae</b>                                    |    |   |  |     |    | 4  | [3,17]   |
| <i>Scrophularia auriculata</i> L. subsp. <i>auriculata</i> |    | 0 |  | 4** |    |    |          |
| <b>Solanaceae</b>                                          |    |   |  |     |    | 8  | [5,6]    |
| <i>Datura stramonium</i> L.                                | 0  |   |  | 4** |    | 0  |          |
| <i>Solanum nigrum</i> L.                                   |    |   |  | 10  |    |    |          |
| <i>Solanum sublobatum</i> Roem. & Schult.                  |    |   |  | 8*  |    |    |          |
| <i>Solanum</i> sp.                                         |    |   |  | 8*  |    |    |          |
| <b>Thymelaeaceae</b>                                       |    |   |  |     |    | 10 | [5]      |
| <i>Daphne gnidium</i> L.                                   |    |   |  | 10  |    |    |          |
| <b>Typhaceae</b>                                           |    |   |  |     |    | 0  | [3,18]   |
| <i>Sparganium erectum</i> L.                               |    |   |  |     |    | 0  |          |
| <i>Sparganium</i> sp.                                      |    |   |  |     |    | 0  |          |
| <i>Typha</i> sp.                                           | 0* |   |  |     |    |    |          |
| <b>Urticaceae</b>                                          |    |   |  |     |    | 0  | [5]      |
| <i>Parietaria judaica</i> L.                               |    |   |  |     | 0  |    |          |

|                         |   |    |  |  |    |       |
|-------------------------|---|----|--|--|----|-------|
| <i>Urtica</i> sp.       | 0 |    |  |  | 0* |       |
| <i>Xanthorrhoeaceae</i> |   |    |  |  |    | 0 [3] |
| <i>Asphodelus</i> sp.   | 0 | 0* |  |  |    |       |

\*on species from the same genus

\*\*potential for

\*\*\*potential for, on species from the same genus

## References:

- Li Vigni, I.; Melati, M. R. Examples of seed dispersal by entomochory. *Acta Botanica Gallica* **1999**, 146(2), 145–156. <https://doi.org/10.1080/12538078.1999.10515813>
- [https://nas.er.usgs.gov/queries/GreatLakes/FactSheet.aspx?Species\\_ID=2669](https://nas.er.usgs.gov/queries/GreatLakes/FactSheet.aspx?Species_ID=2669) (last accessed: 06/08/2021)
- Tavsanoğlu, Ç.; Pausas, J.G. A functional trait database for Mediterranean Basin plants. *Scientific Data* 2018 5:180135.
- <https://www.fs.fed.us/database/feis/plants/vine/vinspp/all.html#Seed%20dispersal> (last accessed: 05/08/2021)
- Royal Botanic Gardens Kew. (2021) [5] (SID). Version 7.1. Available from: <http://data.kew.org/sid/> (August 2021) (last accessed: 11/08/2021)
- Lengyel, S.; Gove, A. D.; Latimer, A. M.; Majer, J. D.; Dunn, R. R. Convergent evolution of seed dispersal by ants, and phylogeny and biogeography in flowering plants: A global survey. *Perspectives in Plant Ecology, Evolution and Systematics* **2010**, 12(1), 43–55. <https://doi.org/10.1016/j.ppees.2009.08.001>
- Minkey, D. M.; Spafford, H. Removal and Burial of Weed Seeds by Ants (*Hymenoptera: Formicidae*) From the Soil Surface of a Cropped Area in Western Australia, *Environmental Entomology* **2016**, Volume 45, Issue 5, October 2016, Pages 1199–1204, <https://doi.org/10.1093/ee/nvw093>
- Schlumpberger, B. O.; Badano, E. I. Diversity of floral visitors to *Echinopsis atacamensis* subsp. *pasacana* (*Cactaceae*). *Haseltonia* **2005**, (11), 18–26. [https://doi.org/10.2985/1070-0048\(2005\)11\[18:DOFVTE\]2.0.CO;2](https://doi.org/10.2985/1070-0048(2005)11[18:DOFVTE]2.0.CO;2)
- Aguiar, F.C.; Fabião, A.M.; Bejarano, M.D.; Merritt, D.; Nilsson, C.; Martins, M.J. (2013) FLOWBASE – a riparian plant traitbase (<http://www.isa.ulisboa.pt/proj/flowbase/>). Centro de Estudos Florestais, Instituto Superior de Agronomia, Universidade de Lisboa, Lisboa, Portugal.
- Azcárate, F. M.; Arqueros, L.; Sánchez, A. M.; Peco, B. Seed and fruit selection by harvester ants, *Messor barbarus*, in Mediterranean grassland and scrubland. *Functional Ecology* **2005**, 19(2), 273–283. <https://doi.org/10.1111/j.0269-8463.2005.00956.x>
- [https://plants.usda.gov/factsheet/pdf/fs\\_juef.pdf](https://plants.usda.gov/factsheet/pdf/fs_juef.pdf) (last accessed: 06/08/2021)
- <https://nas.er.usgs.gov/queries/FactSheet.aspx?SpeciesID=2694> (last accessed: 06/08/2021)
- <https://www.cabi.org/isc/datasheet/116556> (last accessed: 06/08/2021)
- Detrain, C.; Tasse, O. Seed drops and caches by the harvester ant *Messor barbarus*: Do they contribute to seed dispersal in Mediterranean grasslands? *Naturwissenschaften* **2000**, 87(8), 373–376. <https://doi.org/10.1007/s001140050744>
- Hensen, I. Seed predation by ants in south-eastern Spain (Desierto de Tabernas, Almería). *Anales de Biología* **2002**, (24), 89–96.
- Jacquemyn, H.; Brys, R.; Neubert, M. G. Fire increases invasive spread of *Molinia caerulea* mainly through changes in demographic parameters. *Ecological Applications* **2005**, 15(6), 2097–2108. <https://doi.org/10.1890/04-1762>

17. <https://dengarden.com/gardening/Why-Do-Snapdragons-Come-Back-Each-Season-in-Different-Colors> (last accessed: 05/08/2021)
18. Kim, S. H.; Nam, J. M.; Kim, J. G. Establishment strategy of a rare wetland species *Sparganium erectum* in Korea. *Journal of Ecology and Environment* **2017**, 41(1), 1–11. <https://doi.org/10.1186/s41610-017-0045-0>
