# Supplementary material for: Riparian Ecological Infrastructures: Potential for Biodiversity-Related Ecosystem Services in Mediterranean Human-Dominated Landscapes
Source: MDPI journal article supplement (doi:10.3390/su131910508), 2021-09-22
Supplement: s1 [file s1]

**Table S1** - Field protocol for the assessment of riparian habitat heterogeneity.

| SAMPLING UNIT ID                          |                        |                       |                                 |
|-------------------------------------------|------------------------|-----------------------|---------------------------------|
| Study area:                               | Surveyor(s) name:      |                       |                                 |
| Sampling date:                            | Sampling Unit area:    |                       |                                 |
| Sampling Unit code:                       | Crops/Land-use nearby: |                       |                                 |
| GPS coordinates:                          |                        |                       |                                 |
| Photos:                                   |                        |                       |                                 |
| 1. VEGETATION STRUCTURE*                  |                        |                       |                                 |
| 1.1 Native tree species (N°):             |                        |                       |                                 |
| 1.2 Invasive species cover (%)            | Dominant<br>≥ 30       | Abundant<br>]0;30[    | None or isolated<br>individuals |
| 1.3 Vertical structure of vegetation (N°) | 1 strata               | 2 or 3 strata         | 4 strata                        |
| 2. VEGETATION HABITATS*                   |                        |                       |                                 |
| 2.1 Microhabitats at trees above 3m (N°)  | None                   | 1 or 2<br>individuals | ≥3 individuals                  |
| 2.2 Microhabitats at trees below 3m (N°)  | None                   | 1 or 2<br>individuals | ≥3 individuals                  |
| 2.3 Standing dead trees (N°)              | None                   | 1 or 2<br>individuals | ≥3 individuals                  |
| 2.4 Dead trunks on the ground (N°)        | None                   | 1 or 2 trunks         | >3 trunks                       |
| 2.5 Large living trees (N°)               | 0                      | 1 to 4<br>individuals | ≥5 individuals                  |
| 2.6 Leaf litter cover (%)                 | None                   | ]0;50[                | ≥ 50                            |
| 3. ASSOCIATED HABITATS*                   |                        |                       |                                 |
| 3.1 Rocky habitats (N°)                   | None                   | 1 type                | 2 types and more                |
| 3.2 Aquatic habitats (N°)                 | None                   | 1 type                | 2 types and more                |
| 4. VEGETATION MANAGEMENT*                 |                        |                       |                                 |
| 4.1 Understorey clearing (%)              | ≥ 60                   | ]20;60[               | < 20                            |
| 4.2 Tree clearing (%)                     | ≥ 60                   | ]20;60[               | < 20                            |
| 5. VEGETATION COMPOSITION                 |                        |                       |                                 |

| 5.1 Tree cover (%)                                                                 |                  | Dominant<br>≥ 30   | Present<br>]0;30[    |
|------------------------------------------------------------------------------------|------------------|--------------------|----------------------|
| <i>Acacia</i> sp.                                                                  |                  |                    |                      |
| <i>Acer negundo</i> L.                                                             |                  |                    |                      |
| <i>Alnus glutinosa</i> (L.) Gaertn.                                                |                  |                    |                      |
| <i>Casuarina cunninghamiana</i> Miq.                                               |                  |                    |                      |
| <i>Celtis australis</i> L.                                                         |                  |                    |                      |
| <i>Citrus limon</i> (L.) Burm. f.                                                  |                  |                    |                      |
| <i>Cydonia oblonga</i> Mill.                                                       |                  |                    |                      |
| <i>Eucalyptus globulus</i> Labill.                                                 |                  |                    |                      |
| <i>Ficus carica</i> L.                                                             |                  |                    |                      |
| <i>Fraxinus angustifolia</i> Vahl                                                  |                  |                    |                      |
| <i>Juglans nigra</i> L.                                                            |                  |                    |                      |
| <i>Laurus nobilis</i> L.                                                           |                  |                    |                      |
| <i>Ligustrum lucidum</i> W. T. Aiton                                               |                  |                    |                      |
| <i>Olea europaea</i> L.                                                            |                  |                    |                      |
| <i>Pinus pinaster</i> Aiton                                                        |                  |                    |                      |
| <i>Pinus pinea</i> L.                                                              |                  |                    |                      |
| <i>Populus nigra</i> L.                                                            |                  |                    |                      |
| <i>Populus</i> spp.                                                                |                  |                    |                      |
| <i>Prunus domestica</i> L.                                                         |                  |                    |                      |
| <i>Prunus spinosa</i> L.                                                           |                  |                    |                      |
| <i>Pyrus</i> sp.                                                                   |                  |                    |                      |
| <i>Quercus rotundifolia</i> Lam.                                                   |                  |                    |                      |
| <i>Quercus</i> sp.                                                                 |                  |                    |                      |
| <i>Quercus suber</i> L.                                                            |                  |                    |                      |
| <i>Salix alba</i> L.                                                               |                  |                    |                      |
| <i>Salix atrocinerea</i> Brot.                                                     |                  |                    |                      |
| <i>Salix salviifolia</i> Brot.                                                     |                  |                    |                      |
| <i>Salix</i> sp.                                                                   |                  |                    |                      |
| Other:                                                                             |                  |                    |                      |
| 5.2 Shrub cover (%)                                                                | Dominant<br>≥ 30 | Abundant<br>]0;30[ | Isolated individuals |
| <i>Arbutus unedo</i> L.                                                            |                  |                    |                      |
| <i>Cistus</i> sp.                                                                  |                  |                    |                      |
| <i>Crataegus monogyna</i> Jacq.                                                    |                  |                    |                      |
| <i>Cytisus</i> sp., <i>Genista</i> sp., <i>Retama</i> sp., and <i>Spartium</i> sp. |                  |                    |                      |
| <i>Erica</i> sp.                                                                   |                  |                    |                      |
| <i>Frangula alnus</i> Mill.                                                        |                  |                    |                      |
| <i>Genista tridentata</i> L.                                                       |                  |                    |                      |
| <i>Hakea sericea</i> Schrad. & J.C.Wendl                                           |                  |                    |                      |

|                                                                     |                          |                            |                             |
|---------------------------------------------------------------------|--------------------------|----------------------------|-----------------------------|
| <i>Myrtus communis</i> L.                                           |                          |                            |                             |
| <i>Phillyrea angustifolia</i> L.                                    |                          |                            |                             |
| <i>Phillyrea latifolia</i> L.                                       |                          |                            |                             |
| <i>Phillyrea</i> sp.                                                |                          |                            |                             |
| <i>Pistacia lentiscus</i> L.                                        |                          |                            |                             |
| <i>Prunus lusitanica</i> L.                                         |                          |                            |                             |
| <i>Rhamnus alaternus</i> L.                                         |                          |                            |                             |
| <i>Rosa canina</i> L.                                               |                          |                            |                             |
| <i>Rosa sempervirens</i> L.                                         |                          |                            |                             |
| <i>Rubus</i> sp.                                                    |                          |                            |                             |
| <i>Ruscus aculeatus</i> L.                                          |                          |                            |                             |
| <i>Sambucus nigra</i> L.                                            |                          |                            |                             |
| <i>Tamarix africana</i> Poir.                                       |                          |                            |                             |
| <i>Ulex</i> sp., <i>Stauracanthus</i> sp., and <i>Asparagus</i> sp. |                          |                            |                             |
| <i>Vitis vinifera</i> L.                                            |                          |                            |                             |
| Other:                                                              |                          |                            |                             |
| <b>5.3 Herbaceous plant families cover (%)</b>                      | <b>Dominant<br/>≥ 30</b> | <b>Abundant<br/>]0;30[</b> | <b>Isolated individuals</b> |
| <i>Alliaceae</i>                                                    |                          |                            |                             |
| <i>Amaranthaceae</i>                                                |                          |                            |                             |
| <i>Apiaceae</i>                                                     |                          |                            |                             |
| <i>Apocynaceae</i>                                                  |                          |                            |                             |
| <i>Araceae</i>                                                      |                          |                            |                             |
| <i>Asteraceae</i>                                                   |                          |                            |                             |
| <i>Boraginaceae</i>                                                 |                          |                            |                             |
| <i>Brassicaceae</i>                                                 |                          |                            |                             |
| <i>Cactaceae</i>                                                    |                          |                            |                             |
| <i>Campanulaceae</i>                                                |                          |                            |                             |
| <i>Caprifoliaceae</i>                                               |                          |                            |                             |
| <i>Commelinaceae</i>                                                |                          |                            |                             |
| <i>Convolvulaceae</i>                                               |                          |                            |                             |
| <i>Cucurbitaceae</i>                                                |                          |                            |                             |
| <i>Cyperaceae</i> / <i>Juncaceae</i>                                |                          |                            |                             |
| <i>Euphorbiaceae</i>                                                |                          |                            |                             |
| <i>Fabaceae</i>                                                     |                          |                            |                             |
| <i>Gentianaceae</i>                                                 |                          |                            |                             |
| <i>Geraniaceae</i>                                                  |                          |                            |                             |
| <i>Hypericaceae</i>                                                 |                          |                            |                             |
| <i>Iridaceae</i>                                                    |                          |                            |                             |
| <i>Lamiaceae</i>                                                    |                          |                            |                             |
| <i>Liliaceae</i>                                                    |                          |                            |                             |

|                            |  |  |  |
|----------------------------|--|--|--|
| <i>Lythraceae</i>          |  |  |  |
| <i>Malvaceae</i>           |  |  |  |
| <i>Onagraceae</i>          |  |  |  |
| <i>Papaveraceae</i>        |  |  |  |
| <i>Phytolaccaceae</i>      |  |  |  |
| <i>Plantaginaceae</i>      |  |  |  |
| <i>Poaceae</i>             |  |  |  |
| <i>Polygonaceae</i>        |  |  |  |
| <i>Portulacaceae</i>       |  |  |  |
| <i>Primulaceae</i>         |  |  |  |
| <i>Rosaceae</i>            |  |  |  |
| <i>Rubiaceae</i>           |  |  |  |
| <i>Santalaceae</i>         |  |  |  |
| <i>Scrophulariaceae</i>    |  |  |  |
| <i>Solanaceae</i>          |  |  |  |
| <i>Thymelaeaceae</i>       |  |  |  |
| <i>Typhaceae</i>           |  |  |  |
| <i>Urticaceae</i>          |  |  |  |
| <i>Xanthorrhoeaceae</i>    |  |  |  |
| Other:                     |  |  |  |
| <b>Other observations:</b> |  |  |  |

\* Based on the Indice de Biodiversité Potentielle (IBP). Larrieu, L.; Gonin, P. L'Indice de biodiversité potentielle (IBP): Une méthode simple et rapide pour évaluer la biodiversité potentielle des peuplements forestiers. *Revue Forestiere Francaise* **2008**, 60(6), 727–748.
