# Supplementary material for: Riparian Ecological Infrastructures: Potential for Biodiversity-Related Ecosystem Services in Mediterranean Human-Dominated Landscapes
Source: MDPI journal article supplement (doi:10.3390/su131910508), 2021-09-22
Supplement: s1 [file s1]

**Table S14** - Plant-growth form classification, riparian classification, nativeness and relative occurrence of shrubby taxa (%) in Sampling Units located in the Intensive Agriculture (N=61), Extensive Agriculture (N=46) and Forest Production (N=44) landscapes.

| Taxa                                                                                 | Raunkiaer<br>classification             | Riparian<br>classification | Nativeness | Intensive Agriculture   |          |          | Extensive Agriculture   |          |          | Forest Production       |          |          |
|--------------------------------------------------------------------------------------|-----------------------------------------|----------------------------|------------|-------------------------|----------|----------|-------------------------|----------|----------|-------------------------|----------|----------|
|                                                                                      |                                         |                            |            | Isolated<br>individuals | Abundant | Dominant | Isolated<br>individuals | Abundant | Dominant | Isolated<br>individuals | Abundant | Dominant |
| <i>Arbutus unedo</i> L.                                                              | Microphanerophyte                       | Facultative                | Native     |                         | 1.64     |          | 2.17                    | 2.17     |          | 6.82                    | 18.18    | 6.82     |
| <i>Cistus</i> sp.                                                                    | Nanophanerophyte                        | Non-riparian               | Native     | 4.92                    |          |          | 10.87                   | 50.00    | 4.35     | 6.82                    | 45.45    | 2.27     |
| <i>Crataegus monogyna</i> Jacq.                                                      | Microphanerophyte                       | Facultative                | Native     | 3.28                    | 1.64     |          | 4.35                    |          |          | 6.82                    | 2.27     |          |
| <i>Cytisus</i> sp., <i>Genista</i> sp.,<br><i>Retama</i> sp. and <i>Spartium</i> sp. | Nanophanerophyte                        | Non-riparian               | Native     |                         |          |          | 2.17                    |          | 2.17     |                         |          |          |
| <i>Erica</i> sp.                                                                     | Nanophanerophyte                        | Facultative                | Native     |                         | 1.64     |          | 4.35                    | 15.22    | 4.35     | 4.55                    | 54.55    | 4.55     |
| <i>Frangula alnus</i> Mill.                                                          | Microphanerophyte                       | Obligate                   | Native     | 1.64                    |          |          | 2.17                    |          |          | 2.27                    |          |          |
| <i>Genista tridentata</i> L.                                                         | Nanophanerophyte                        | Non-riparian               | Native     |                         |          |          |                         |          |          | 4.55                    | 9.09     |          |
| <i>Hakea sericea</i> Schrad. &<br>J.C.Wendl                                          | Microphanerophyte                       | Non-riparian               | Non-native |                         |          |          |                         |          |          | 15.91                   | 4.55     | 9.09     |
| <i>Myrtus communis</i> L.                                                            | Microphanerophyte                       | Facultative                | Native     |                         | 1.64     |          |                         | 2.17     |          |                         | 9.09     |          |
| <i>Phillyrea angustifolia</i> L.                                                     | Nanophanerophyte                        | Non-riparian               | Native     |                         |          |          |                         | 2.17     |          | 6.82                    | 4.55     |          |
| <i>Phillyrea latifolia</i> L.                                                        | Microphanerophyte                       | Facultative                | Native     |                         |          |          | 2.17                    |          |          |                         |          |          |
| <i>Phillyrea</i> sp.                                                                 | Nanophanerophyte /<br>Microphanerophyte | Non-riparian               | Native     |                         | 1.64     |          |                         |          |          |                         | 2.27     | 2.27     |
| <i>Pistacia lentiscus</i> L.                                                         | Microphanerophyte                       | Facultative                | Native     | 1.64                    |          |          |                         |          |          | 2.27                    | 4.55     |          |
| <i>Prunus lusitanica</i> L.                                                          | Microphanerophyte                       | Preferential               | Native     |                         |          |          |                         |          |          | 2.27                    |          |          |
| <i>Rhamnus alaternus</i> L.                                                          | Microphanerophyte                       | Non-riparian               | Native     |                         |          |          |                         |          |          |                         | 2.27     |          |
| <i>Rosa canina</i> L.                                                                | Nanophanerophyte                        | Facultative                | Native     |                         |          |          | 2.17                    |          |          |                         |          |          |
| <i>Rosa sempervirens</i> L.                                                          | Microphanerophyte                       | Facultative                | Native     |                         | 1.64     |          |                         |          |          |                         |          |          |
| <i>Rubus</i> sp.                                                                     | Nanophanerophyte                        | Facultative                | Native     | 3.28                    | 19.67    | 49.18    |                         | 23.91    | 71.74    | 4.55                    | 45.45    | 38.64    |
| <i>Ruscus aculeatus</i> L.                                                           | Nanophanerophyte                        | Facultative                | Native     |                         |          |          |                         |          |          |                         | 2.27     |          |
| <i>Sambucus nigra</i> L.                                                             | Microphanerophyte                       | Preferential               | Native     | 3.28                    | 3.28     |          |                         |          |          |                         |          |          |
| <i>Tamarix africana</i> Poir.                                                        | Microphanerophyte                       | Obligate                   | Native     | 1.64                    |          |          |                         |          |          |                         |          |          |
| <i>Ulex</i> sp., <i>Stauracanthus</i> sp.<br>and <i>Asparagus</i> sp.                | Nanophanerophyte                        | Non-riparian               | Native     | 4.92                    | 3.28     |          | 15.22                   | 36.96    |          | 4.55                    | 61.36    | 11.36    |
| <i>Vitis vinifera</i> L.                                                             | Nanophanerophyte                        | Facultative                | Non-native | 3.28                    | 6.56     |          |                         |          |          |                         |          |          |
