# Supplementary material for: Riparian Ecological Infrastructures: Potential for Biodiversity-Related Ecosystem Services in Mediterranean Human-Dominated Landscapes
Source: MDPI journal article supplement (doi:10.3390/su131910508), 2021-09-22
Supplement: s1 [file s1]

**Table S8** - Scoring assigned to tree taxa for their suitability to seed dispersal by long-range dispersers (birds and non-flying small mammals) based on dispersion mode and plant physiognomy, with references.

| Tree taxa                            | Dispersion mode |           |              | Plant physiognomy |                    | Score         | References |
|--------------------------------------|-----------------|-----------|--------------|-------------------|--------------------|---------------|------------|
|                                      | Anemochory      | Autochory | Endozoochory | Myrmecochory      | Hoarding diaspores | Fleshy fruits |            |
| <i>Acacia</i> sp.                    |                 |           |              | 0                 |                    |               | [1-3]      |
| <i>Acer negundo</i> L.               | 0               |           |              |                   |                    |               | [4]        |
| <i>Alnus glutinosa</i> (L.) Gaertn.  | 0               |           |              |                   |                    |               | [4]        |
| <i>Casuarina cunninghamiana</i> Miq. | 0               |           |              |                   |                    |               | [5]        |
| <i>Celtis australis</i> L.           |                 |           | 10           |                   |                    |               | [4]        |
| <i>Citrus limon</i> (L.) Burm. f.    |                 |           | 10           |                   |                    |               | [6]        |
| <i>Cydonia oblonga</i> Mill.         |                 |           | 10           |                   |                    |               | [5]        |
| <i>Eucalyptus globulus</i> Labill.   |                 |           |              | 0                 |                    |               | [2]        |
| <i>Ficus carica</i> L.               |                 |           | 10           |                   |                    |               | [4]        |
| <i>Fraxinus angustifolia</i> Vahl    | 0               |           |              |                   |                    |               | [3]        |
| <i>Juglans nigra</i> L.              |                 | 0*        |              |                   |                    | 2             | [3,4]      |
| <i>Laurus nobilis</i> L.             |                 |           | 10           |                   |                    |               | [3,5]      |
| <i>Ligustrum lucidum</i> W. T. Aiton |                 |           | 10           |                   |                    |               | [4]        |
| <i>Olea europaea</i> L.              |                 |           | 10           |                   |                    |               | [4]        |
| <i>Pinus pinaster</i> Aiton          | 0               | 0         | 10           |                   |                    |               | [3,5]      |
| <i>Pinus pinea</i> L.                | 0               | 0         | 10           |                   |                    |               | [3,5]      |
| <i>Populus nigra</i> L.              | 0               |           |              |                   |                    |               | [4,5]      |
| <i>Populus</i> spp.                  | 0*              |           |              |                   |                    |               | [4,5]      |
| <i>Prunus domestica</i> L.           |                 |           | 10           |                   |                    |               | [4]        |
| <i>Prunus spinosa</i> L.             |                 |           | 10           |                   |                    |               | [3,4]      |
| <i>Pyrus</i> sp.                     |                 |           | 8*           |                   |                    |               | [5]        |
| <i>Quercus rotundifolia</i> Lam.     |                 |           |              |                   | 8                  |               | [3,5]      |
| <i>Quercus</i> sp.                   |                 |           |              |                   | 8                  |               | [3,5]      |
| <i>Quercus suber</i> L.              |                 |           |              |                   | 8                  |               | [3,5]      |
| <i>Salix alba</i> L.                 | 0               |           |              |                   |                    |               | [3]        |
| <i>Salix atrocinerea</i> Brot.       | 0               |           |              |                   |                    |               | [5]        |

|                                |   |   |     |
|--------------------------------|---|---|-----|
| <i>Salix salviifolia</i> Brot. | 0 | 0 | [4] |
| <i>Salix</i> sp.               | 0 | 0 | [4] |

\*on species from the same genus

## References:

1. Lengyel, S.; Gove, A. D.; Latimer, A. M.; Majer, J. D.; Dunn, R. R. Convergent evolution of seed dispersal by ants, and phylogeny and biogeography in flowering plants: A global survey. *Perspectives in Plant Ecology, Evolution and Systematics* **2010**, 12(1), 43–55. <https://doi.org/10.1016/j.ppees.2009.08.001>
2. Deus, E.; Silva, J. S.; Marchante, H.; Marchante, E.; Félix, C. Are post-dispersed seeds of *Eucalyptus globulus* predated in the introduced range? Evidence from an experiment in Portugal. *Web Ecology* **2018**, 18(1), 67–79. <https://doi.org/10.5194/we-18-67-2018>
3. Tavsanoğlu, Ç.; Pausas, J.G. A functional trait database for Mediterranean Basin plants. *Scientific Data* **2018** 5:180135.
4. Royal Botanic Gardens Kew. (2021) [4] (SID). Version 7.1. Available from: <http://data.kew.org/sid/> (August 2021) (last accessed: 11/08/2021)
5. Aguiar, F.C.; Fabião, A.M.; Bejarano, M.D.; Merritt, D.; Nilsson, C.; Martins, M.J. (2013) FLOWBASE – a riparian plant traitbase (<http://www.isa.ulisboa.pt/proj/flowbase/>). Centro de Estudos Florestais, Instituto Superior de Agronomia, Universidade de Lisboa, Lisboa, Portugal.
6. <https://science.jrank.org/pages/1507/Citrus-Trees-Biology-citrus.html> (last accessed: 05/08/2021)
