# Supplementary material for: Riparian Ecological Infrastructures: Potential for Biodiversity-Related Ecosystem Services in Mediterranean Human-Dominated Landscapes
Source: MDPI journal article supplement (doi:10.3390/su131910508), 2021-09-22
Supplement: s1 [file s1]

**Table S12** - Dunn's post hoc comparisons (including the value for the z-statistic (z); the mean ranking of the first level/group of the comparison ( $W_i$ ); the mean ranking for the second level/group of the comparison ( $W_j$ ); and the p-value (p)) between Intensive Agriculture (IA), Extensive Agriculture (EA) and Forest Production (FP) landscape matrices, for Habitat Ecological Infrastructure's Diversity Index (HEIDI) estimated global values and for short-range dispersers and medium-range dispersers.

| HEIDI values            | Comparison - Landscape matrix | z     | $W_i$ | $W_j$ | p      |
|-------------------------|-------------------------------|-------|-------|-------|--------|
| Short-range dispersers  | IA - EA                       | 2.46  | 81.57 | 60.64 | 0.007  |
|                         | EA - FP                       | -1.08 | 81.57 | 91.48 | 0.140  |
|                         | FP - IA                       | 3.58  | 91.48 | 60.64 | <0.001 |
| Medium-range dispersers | IA - EA                       | 0.97  | 75.11 | 66.89 | 0.167  |
|                         | EA - FP                       | -1.58 | 75.11 | 89.57 | 0.057  |
|                         | FP - IA                       | 2.64  | 89.57 | 66.89 | 0.004  |
| Global                  | IA - EA                       | 2.02  | 80.59 | 63.31 | 0.022  |
|                         | EA - FP                       | -0.89 | 80.59 | 88.80 | 0.187  |
|                         | FP - IA                       | 2.95  | 88.80 | 63.31 | 0.002  |
