# Supplementary material for: Riparian Ecological Infrastructures: Potential for Biodiversity-Related Ecosystem Services in Mediterranean Human-Dominated Landscapes
Source: MDPI journal article supplement (doi:10.3390/su131910508), 2021-09-22
Supplement: s1 [file s1]

**Table S15** – Relative occurrence of herbaceous families (%) in Sampling Units located in the Intensive Agriculture (N=61), Extensive Agriculture (N=46) and Forest Production (N=44) landscapes.

| Herbaceous family             | Intensive Agriculture |          |          | Extensive Agriculture |          |          | Forest Production    |          |          |
|-------------------------------|-----------------------|----------|----------|-----------------------|----------|----------|----------------------|----------|----------|
|                               | Isolated individuals  | Abundant | Dominant | Isolated individuals  | Abundant | Dominant | Isolated individuals | Abundant | Dominant |
| <i>Amaranthaceae</i>          | 1.64                  | 3.28     |          |                       |          |          |                      |          |          |
| <i>Amaryllidaceae</i>         |                       |          |          | 2.17                  |          |          |                      |          |          |
| <i>Apiaceae</i>               | 24.59                 | 21.31    | 3.28     | 15.22                 | 8.70     | 2.17     | 15.91                | 6.82     |          |
| <i>Apocynaceae</i>            |                       | 1.64     |          |                       |          |          |                      |          |          |
| <i>Araceae</i>                | 4.92                  | 1.64     |          |                       |          |          |                      |          |          |
| <i>Asteraceae</i>             | 31.15                 | 27.87    | 6.56     | 28.26                 | 36.96    | 2.17     | 25.00                | 20.45    | 9.09     |
| <i>Boraginaceae</i>           | 11.48                 | 3.28     |          | 2.17                  |          |          | 6.82                 | 4.55     |          |
| <i>Brassicaceae</i>           | 4.92                  | 4.92     | 1.64     | 2.17                  |          |          | 18.18                |          |          |
| <i>Cactaceae</i>              | 1.64                  |          |          |                       |          |          |                      |          |          |
| <i>Campanulaceae</i>          |                       | 1.64     |          |                       | 2.17     |          |                      |          |          |
| <i>Caprifoliaceae</i>         |                       |          |          | 6.52                  | 15.22    |          |                      |          |          |
| <i>Commelinaceae</i>          |                       | 1.64     |          |                       |          |          |                      |          |          |
| <i>Convolvulaceae</i>         | 9.84                  | 18.03    |          |                       | 4.35     |          |                      |          |          |
| <i>Cucurbitaceae</i>          | 3.28                  | 4.92     |          |                       |          | 2.17     |                      |          |          |
| <i>Euphorbiaceae</i>          |                       |          |          | 2.17                  | 4.35     |          |                      |          |          |
| <i>Fabaceae</i>               | 8.20                  | 4.92     |          | 4.35                  |          |          | 4.55                 | 2.27     |          |
| <i>Gentianaceae</i>           |                       |          |          |                       |          |          | 2.27                 |          |          |
| <i>Geraniaceae</i>            |                       |          |          |                       |          |          | 4.55                 |          |          |
| <i>Hypericaceae</i>           |                       |          |          | 8.70                  |          |          |                      |          |          |
| <i>Juncaceae / Cyperaceae</i> | 6.56                  | 9.84     |          | 2.17                  | 10.87    | 6.52     | 2.27                 | 2.27     |          |

**Table S14 (Cont.)** - Relative occurrence of herbaceous families (%) in Sampling Units located in the Intensive Agriculture (N=61), Extensive Agriculture (N=46) and Forest Production (N=44) landscapes.

|                         |       |       |       |      |       |       |       |       |       |
|-------------------------|-------|-------|-------|------|-------|-------|-------|-------|-------|
| <i>Lamiaceae</i>        | 9.84  | 9.84  |       | 8.70 | 10.87 |       | 15.91 | 15.91 | 2.27  |
| <i>Liliaceae</i>        |       | 1.64  |       |      |       |       |       |       |       |
| <i>Lythraceae</i>       | 11.48 | 9.84  |       | 2.17 | 6.52  |       | 4.55  |       |       |
| <i>Malvaceae</i>        | 6.56  | 1.64  |       |      |       |       |       |       |       |
| <i>Onagraceae</i>       |       |       |       |      | 2.17  |       |       |       |       |
| <i>Papaveraceae</i>     | 3.28  |       | 1.64  |      | 2.17  |       |       |       |       |
| <i>Phytolaccaceae</i>   | 6.56  | 1.64  |       |      |       |       |       |       |       |
| <i>Plantaginaceae</i>   | 1.64  |       |       | 8.70 | 6.52  |       | 11.36 | 4.55  | 2.27  |
| <i>Poaceae</i>          | 1.64  | 50.82 | 47.54 | 2.17 | 39.13 | 41.30 | 4.55  | 38.64 | 25.00 |
| <i>Polygonaceae</i>     | 3.28  | 11.48 | 3.28  |      |       |       |       |       |       |
| <i>Portulacaceae</i>    | 1.64  |       |       |      |       |       |       |       |       |
| <i>Primulaceae</i>      | 3.28  |       |       |      |       |       |       |       |       |
| <i>Rosaceae</i>         |       | 1.64  |       |      |       |       | 4.55  |       |       |
| <i>Rubiaceae</i>        |       | 1.64  |       |      | 2.17  |       | 2.27  |       |       |
| <i>Santalaceae</i>      |       |       |       | 2.17 |       |       |       |       |       |
| <i>Scrophulariaceae</i> | 4.92  | 4.92  |       | 2.17 |       |       |       |       |       |
| <i>Solanaceae</i>       | 11.48 | 6.56  |       |      |       |       | 2.27  |       |       |
| <i>Thymelaeaceae</i>    |       |       |       | 8.70 | 4.35  |       |       |       |       |
| <i>Typhaceae</i>        |       | 9.84  | 9.84  |      | 6.52  |       |       |       |       |
| <i>Urticaceae</i>       | 1.64  |       |       |      |       |       |       |       |       |
| <i>Xanthorrhoeaceae</i> |       |       |       | 8.70 |       |       | 2.27  | 2.27  |       |
