# Supplementary material for: Riparian Ecological Infrastructures: Potential for Biodiversity-Related Ecosystem Services in Mediterranean Human-Dominated Landscapes
Source: MDPI journal article supplement (doi:10.3390/su131910508), 2021-09-22
Supplement: s1 [file s1]

**Table S6** - Scoring assigned to shrub taxa for their suitability to pollination by medium-range dispersers (pollinators) based on pollination mode, with references.

| Shrub taxa                                                                         | Pollination mode  |                 | Score | References |
|------------------------------------------------------------------------------------|-------------------|-----------------|-------|------------|
|                                                                                    | Insect-pollinated | Wind-pollinated |       |            |
| <i>Arbutus unedo</i> L.                                                            | Yes               |                 | 10    | [1]        |
| <i>Cistus</i> sp.                                                                  | Yes               |                 | 9     | [1]        |
| <i>Crataegus monogyna</i> Jacq.                                                    | Yes               |                 | 10    | [1]        |
| <i>Cytisus</i> sp., <i>Genista</i> sp., <i>Retama</i> sp., and <i>Spartium</i> sp. | Yes               |                 | 9     | [1]        |
| <i>Erica</i> sp.                                                                   | Yes               |                 | 10    | [1]        |
| <i>Frangula alnus</i> Mill.                                                        | Yes               |                 | 5     | [1]        |
| <i>Genista tridentata</i> L.                                                       | Yes               |                 | 9     | [1]        |
| <i>Hakea sericea</i> Schrad. & J.C.Wendl                                           | Yes               |                 | 8     | [2]        |
| <i>Myrtus communis</i> L.                                                          | Yes               |                 | 9     | [1]        |
| <i>Phillyrea angustifolia</i> L.                                                   | Yes               |                 | 1     | [1]        |
| <i>Phillyrea latifolia</i> L.                                                      | Yes               |                 | 1     | [1]        |
| <i>Phillyrea</i> sp.                                                               | Yes               |                 | 1     | [1]        |
| <i>Pistacia lentiscus</i> L.                                                       |                   | Yes             | 0     |            |
| <i>Prunus lusitanica</i> L.                                                        | Yes               |                 | 10    | [1]        |
| <i>Rhamnus alaternus</i> L.                                                        | Yes               |                 | 5     | [1]        |
| <i>Rosa canina</i> L.                                                              | Yes               |                 | 10    | [1]        |
| <i>Rosa sempervirens</i> L.                                                        | Yes               |                 | 10    | [1]        |
| <i>Rubus</i> sp.                                                                   | Yes               |                 | 10    | [1]        |
| <i>Ruscus aculeatus</i> L.                                                         | Yes               |                 | 2     | [3]        |
| <i>Sambucus nigra</i> L.                                                           | Yes               |                 | 8     | [1]        |
| <i>Tamarix africana</i> Poir.                                                      | Yes               |                 | 9     | [4]        |
| <i>Ulex</i> sp., <i>Stauracanthus</i> sp., and <i>Asparagus</i> sp.                | Yes               |                 | 9     | [1]        |
| <i>Vitis vinifera</i> L.                                                           | Yes               |                 | 5     | [5]        |

## References:

1. Santos, A.; Fernandes, M. R.; Aguiar, F. C.; Branco, M. R.; Ferreira, M. T. Effects of riverine landscape changes on pollination services: A case study on the River Minho, Portugal. *Ecological Indicators* **2018**, 89(February), 656–666. <https://doi.org/10.1016/j.ecolind.2018.02.036>
2. Hurn, V. M.; Moller, H. An assessment of the contribution of honey bees (*Apis mellifera*) to weed reproduction in New Zealand protected natural areas. *New Zealand Journal of Ecology* **1995**, 19(2), 111–122.
3. Martinez-Palle, E.; Aronne, G. Pollination failure in mediterranean *Ruscus aculeatus* L. *Botanical Journal of the Linnean Society* **2000**, 134(3), 443–452. <https://doi.org/10.1006/bojl.2000.0342>
4. Marlin, D.; Newete, S. W.; Mayonde, S. G.; Smit, E. R.; Byrne, M. J. Invasive Tamarix (*Tamaricaceae*) in South Africa: current research and the potential for biological control. *Biological Invasions* **2017**, 19(10), 2971–2992. <https://doi.org/10.1007/s10530-017-1501-6>
5. Muñoz-Rodríguez, A. F.; Tormo, R.; Silva, M. I. Pollination Dynamics in *Vitis vinifera* L. *American Journal of Enology and Viticulture* **2011** 62: 113-117; <https://doi.org/10.5344/ajev.2010.10047>
