# Supplementary material for: Riparian Ecological Infrastructures: Potential for Biodiversity-Related Ecosystem Services in Mediterranean Human-Dominated Landscapes
Source: MDPI journal article supplement (doi:10.3390/su131910508), 2021-09-22
Supplement: s1 [file s1]

**Table S11** - Dunn's post hoc comparisons (including the value for the z-statistic (z); the mean ranking of the first level/group of the comparison ( $W_i$ ); the mean ranking for the second level/group of the comparison ( $W_j$ ); and the p-value (p)) between Intensive Agriculture (IA), Extensive Agriculture (EA) and Forest Production (FP) landscape matrices, for the patch size, nearest neighbour, and shape index of woody and non-woody Riparian Ecological Infrastructures.

| Landscape metric  | REI class | Comparison - Landscape Matrix | z      | $W_i$   | $W_j$   | p      |
|-------------------|-----------|-------------------------------|--------|---------|---------|--------|
| Patch size        | Woody     | IA - EA                       | -4.152 | 417.838 | 513.355 | <0.001 |
|                   |           | EA - FP                       | -3.939 | 417.838 | 502.379 | <0.001 |
|                   |           | FP - IA                       | -0.505 | 502.379 | 513.355 | 0.307  |
|                   | Non-woody | IA - EA                       | 3.276  | 497.386 | 417.225 | <0.001 |
|                   |           | EA - FP                       | -2.067 | 497.386 | 541.926 | 0.019  |
|                   |           | FP - IA                       | 5.539  | 541.926 | 417.225 | <0.001 |
| Nearest Neighbour | Woody     | IA - EA                       | 2.538  | 513.267 | 454.876 | 0.006  |
|                   |           | EA - FP                       | 1.945  | 513.267 | 471.515 | 0.026  |
|                   |           | FP - IA                       | 0.765  | 471.515 | 454.876 | 0.222  |
|                   | Non-woody | IA - EA                       | -3.951 | 481.024 | 577.723 | <0.001 |
|                   |           | EA - FP                       | 0.989  | 481.024 | 459.703 | 0.161  |
|                   |           | FP - IA                       | -5.242 | 459.703 | 577.723 | <0.001 |
| Shape index       | Woody     | IA - EA                       | -3.238 | 412.159 | 486.654 | <0.001 |
|                   |           | EA - FP                       | -5.339 | 412.159 | 526.752 | <0.001 |
|                   |           | FP - IA                       | 1.845  | 526.752 | 486.654 | 0.033  |
|                   | Non-woody | IA - EA                       | 3.875  | 485.692 | 390.848 | <0.001 |
|                   |           | EA - FP                       | -3.683 | 485.692 | 565.061 | <0.001 |
|                   |           | FP - IA                       | 7.739  | 565.061 | 390.848 | <0.001 |
