# Supplementary material for: Riparian Ecological Infrastructures: Potential for Biodiversity-Related Ecosystem Services in Mediterranean Human-Dominated Landscapes
Source: MDPI journal article supplement (doi:10.3390/su131910508), 2021-09-22
Supplement: s1 [file s1]

**Table S7** - Scoring assigned to herbaceous families for their suitability to pollination by medium-range dispersers (pollinators) based on pollination mode, with references.

| Herbaceous families           | Pollination mode  |                 |                 | Score | References |
|-------------------------------|-------------------|-----------------|-----------------|-------|------------|
|                               | Insect-pollinated | Self-pollinated | Wind-pollinated |       |            |
| <i>Amaranthaceae</i>          | Yes               |                 |                 | 0     | [6]        |
| <i>Amaryllidaceae</i>         | Yes               |                 |                 | 5     | [1]        |
| <i>Apiaceae</i>               | Yes               |                 |                 | 10    | [2]        |
| <i>Apocynaceae</i>            | Yes               |                 |                 | 6     | [3]        |
| <i>Araceae</i>                | Yes               |                 |                 | 4     | [4]        |
| <i>Asteraceae</i>             | Yes               |                 |                 | 9     | [2]        |
| <i>Boraginaceae</i>           | Yes               |                 |                 | 10    | [2]        |
| <i>Brassicaceae</i>           | Yes               |                 |                 | 8     | [2]        |
| <i>Cactaceae</i>              | Yes               |                 |                 | 7     | [5]        |
| <i>Campanulaceae</i>          | Yes               |                 |                 | 5     | [2]        |
| <i>Caprifoliaceae</i>         | Yes               |                 |                 | 9     | [2]        |
| <i>Commelinaceae</i>          | Yes               |                 |                 | 9     | [2]        |
| <i>Convolvulaceae</i>         | Yes               |                 |                 | 8     | [2]        |
| <i>Cucurbitaceae</i>          | Yes               |                 |                 | 8     | [2]        |
| <i>Euphorbiaceae</i>          | Yes               |                 |                 | 7     | [2]        |
| <i>Fabaceae</i>               | Yes               |                 |                 | 9     | [2]        |
| <i>Gentianaceae</i>           | Yes               |                 |                 | 7     | [7]        |
| <i>Geraniaceae</i>            | Yes               |                 |                 | 9     | [8]        |
| <i>Hypericaceae</i>           | Yes               |                 |                 | 7     | [9]        |
| <i>Iridaceae</i>              | Yes               |                 |                 | 10    | [10]       |
| <i>Juncaceae / Cyperaceae</i> |                   |                 | Yes             | 0     |            |
| <i>Lamiaceae</i>              | Yes               |                 |                 | 10    | [2]        |
| <i>Liliaceae</i>              | Yes               |                 |                 | 5     | [2]        |
| <i>Lythraceae</i>             | Yes               |                 |                 | 10    | [2]        |
| <i>Malvaceae</i>              | Yes               |                 |                 | 8     | [11]       |
| <i>Onagraceae</i>             | Yes               |                 |                 | 2     | [2]        |

|                         |     |     |    |      |
|-------------------------|-----|-----|----|------|
| <i>Papaveraceae</i>     | Yes |     | 8  | [2]  |
| <i>Phytolaccaceae</i>   | Yes |     | 8  | [12] |
| <i>Plantaginaceae</i>   | Yes |     | 3  | [2]  |
| <i>Poaceae</i>          | Yes |     | 0  | [2]  |
| <i>Polygonaceae</i>     | Yes |     | 9  | [2]  |
| <i>Portulacaceae</i>    |     | Yes | 0  |      |
| <i>Primulaceae</i>      | Yes |     | 6  | [2]  |
| <i>Rosaceae</i>         | Yes |     | 10 | [2]  |
| <i>Rubiaceae</i>        | Yes |     | 7  | [2]  |
| <i>Santalaceae</i>      | Yes |     | 7  | [13] |
| <i>Scrophulariaceae</i> | Yes |     | 9  | [2]  |
| <i>Solanaceae</i>       | Yes |     | 7  | [2]  |
| <i>Thymelaeaceae</i>    | Yes |     | 10 | [14] |
| <i>Typhaceae</i>        |     | Yes | 0  |      |
| <i>Urticaceae</i>       | Yes |     | 4  | [2]  |
| <i>Xanthorrhoeaceae</i> | Yes |     | 10 | [15] |

## References:

1. Åström, H.; Hæggström, C. A. Generative reproduction in *Allium oleraceum* (Alliaceae). *Annales Botanici Fennici* **2004**, 41(1), 1–14.
2. Santos, A.; Fernandes, M. R.; Aguiar, F. C.; Branco, M. R.; Ferreira, M. T. Effects of riverine landscape changes on pollination services: A case study on the River Minho, Portugal. *Ecological Indicators* **2018**, 89(February), 656–666. <https://doi.org/10.1016/j.ecolind.2018.02.036>
3. Herrera, J. The reproductive biology of a riparian Mediterranean shrub, *Nerium oleander* L. (Apocynaceae). *Botanical Journal of the Linnean Society* **1991**, 106(2), 147–172. <https://doi.org/10.1111/j.1095-8339.1991.tb02289.x>
4. Bröderbauer, D.; Diaz, A.; Weber, A. Reconstructing the origin and elaboration of insect-trapping inflorescences in the *araceae*. *American Journal of Botany* **2012**, 99(10), 1666–1679. <https://doi.org/10.3732/ajb.1200274>
5. Grant, V.; Hurd, P. D. Pollination of the southwestern Opuntias. *Plant Systematics and Evolution* **1979**, 133(1–2), 15–28. <https://doi.org/10.1007/BF00985876>
6. Bassett, I. J.; Crompton, C. W. The biology of Canadian weeds. 32. *Chenopodium album* L. *Canadian Journal of Plant Sciences* **1978**, 58(1), 1061–1072.
7. Brys, R.; Jacquemyn, H. Variation in the functioning of autonomous self-pollination, pollinator services and floral traits in three *Centaureum* species. *Annals of Botany* **2011**, 107(6), 917–925. <https://doi.org/10.1093/aob/mcr032>
8. Jeiter, J.; Hilger, H. H.; Smets, E. F.; Weigend, M. The relationship between nectaries and floral architecture: A case study in *Geraniaceae* and *Hypseocharitaceae*. *Annals of Botany* **2017**, 120(5), 791–803. <https://doi.org/10.1093/aob/mcx101>

9. Hanley, M. E.; Goulson, D. Introduced weeds pollinated by introduced bees: Cause or effect? *Weed Biology and Management* **2003**, 3(4), 204–212. <https://doi.org/10.1046/j.1444-6162.2003.00108.x>
10. Jacobs, J.; Graves, M.; Mangold, J. Ecology and Management of Yellowflag Iris (*Iris pseudacorus* L.). *United States Department of Agriculture: Natural Resources Conservation Service* **2010**, (August), 1–6.
11. Gorenflo, A.; Diekötter, T.; van Kleunen, M.; Wolters, V.; Jauker, F. Contrasting pollination efficiency and effectiveness among flower visitors of *Malva sylvestris*, *Borago officinalis* and *Onobrychis viciifolia*. *Journal of Pollination Ecology* **2017**, 21(1), 62–70.
12. Armesto, J. J.; Cheplick, G. P.; McDonnell, M. J. Observations on the Reproductive Biology of *Phytolacca americana* (Phytolaccaceae). *Bulletin of the Torrey Botanical Club* **1983**, 110(3), 380. <https://doi.org/10.2307/2996194>
13. Aronne, G.; Wilcock, C. C.; Pizzolongo, P. Pollination biology and sexual differentiation of *Osyris alba* (Santalaceae) in the Mediterranean region. *Plant Systematics and Evolution* **1993**, 188(1–2), 1–16. <https://doi.org/10.1007/BF00937832>
14. Roccotiello, E.; Casazza, G.; Cornara, L.; Moncalvo, A.; Minuto, L. Reproductive success in *Daphne gnidium* (Thymelaeaceae). *Boll. Mus. Ist. Biol. Univ. Genova* **2012**, 74, 22–37.
15. Potts, S. G.; Petanidou, T.; Roberts, S.; O’Toole, C.; Hulbert, A.; Willmer, P. Plant-pollinator biodiversity and pollination services in a complex Mediterranean landscape. *Biological Conservation* **2006**, 129(4), 519–529. <https://doi.org/10.1016/j.biocon.2005.11.019>
