# Supplementary material for: Riparian Ecological Infrastructures: Potential for Biodiversity-Related Ecosystem Services in Mediterranean Human-Dominated Landscapes
Source: MDPI journal article supplement (doi:10.3390/su131910508), 2021-09-22
Supplement: s1 [file s1]

**Table S9** - Scoring assigned to tree taxa for their suitability to seed dispersal by long-range dispersers (birds and non-flying small mammals) based on dispersion mode, with references.

| Shrub taxa                                                                         | Dispersion mode |           |              |            |              | Score | References |
|------------------------------------------------------------------------------------|-----------------|-----------|--------------|------------|--------------|-------|------------|
|                                                                                    | Anemochory      | Autochory | Endozoochory | Hydrochory | Myrmecochory |       |            |
| <i>Arbutus unedo</i> L.                                                            |                 |           | 10           |            |              | 10    | [1]        |
| <i>Cistus</i> sp.                                                                  |                 |           |              |            | 0            | 0     | [2,3]      |
| <i>Crataegus monogyna</i> Jacq.                                                    |                 |           | 10           |            |              | 10    | [1]        |
| <i>Cytisus</i> sp., <i>Genista</i> sp., <i>Retama</i> sp., and <i>Spartium</i> sp. |                 |           |              |            |              |       |            |
| <i>Cytisus</i> sp.                                                                 |                 |           |              |            | 0            |       |            |
| <i>Genista</i> sp.                                                                 |                 |           |              |            | 0            | 0     | [2,4]      |
| <i>Retama</i> sp.                                                                  |                 |           |              |            | 0            |       |            |
| <i>Spartium</i> sp.                                                                | 0               | 0         |              | 0          |              |       |            |
| <i>Erica</i> sp.                                                                   | 0               | 0         |              |            |              | 0     | [2]        |
| <i>Frangula alnus</i> Mill.                                                        |                 |           | 10           |            |              | 10    | [1]        |
| <i>Genista tridentata</i> L.                                                       |                 |           |              |            | 0            | 0     | [2]        |
| <i>Hakea sericea</i> Schrad. & J.C.Wendl                                           | 0               |           |              |            |              | 0     | [5]        |
| <i>Myrtus communis</i> L.                                                          |                 |           | 10           |            |              | 10    | [2]        |
| <i>Phillyrea angustifolia</i> L.                                                   |                 |           | 10           |            |              | 10    | [1,2]      |
| <i>Phillyrea latifolia</i> L.                                                      |                 |           | 10           |            |              | 10    | [1,2]      |
| <i>Phillyrea</i> sp.                                                               |                 |           | 8*           |            |              | 8     | [1,2]      |
| <i>Pistacia lentiscus</i> L.                                                       |                 |           | 10           |            |              | 10    | [1,6]      |
| <i>Prunus lusitanica</i> L.                                                        |                 |           | 10           |            |              | 10    | [1,2]      |
| <i>Rhamnus alaternus</i> L.                                                        |                 |           | 10           |            |              | 10    | [1,2]      |
| <i>Rosa canina</i> L.                                                              |                 |           | 10           |            |              | 10    | [1,2]      |
| <i>Rosa sempervirens</i> L.                                                        |                 |           | 8*           |            |              | 8     | [1,2]      |
| <i>Rubus</i> sp.                                                                   |                 |           | 10           |            |              | 10    | [2,7]      |
| <i>Ruscus aculeatus</i> L.                                                         |                 |           | 8*           |            |              | 8     | [2,7]      |

|                                                                     |   |    |    |       |
|---------------------------------------------------------------------|---|----|----|-------|
| <i>Sambucus nigra</i> L.                                            |   | 10 | 10 | [1,2] |
| <i>Tamarix africana</i> Poir.                                       | 0 |    | 0  | [2]   |
| <i>Ulex</i> sp., <i>Stauracanthus</i> sp., and <i>Asparagus</i> sp. |   |    |    |       |
| <i>Ulex</i> sp.                                                     |   |    | 0  |       |
| <i>Stauracanthus</i> sp.                                            |   |    | 0  | [4]   |
| <i>Asparagus</i> sp.                                                |   | 10 |    |       |
| <i>Vitis vinifera</i> L.                                            |   | 10 | 10 | [1]   |

\*on species from the same genus

#### References:

1. Royal Botanic Gardens Kew. (2021) [1] (SID). Version 7.1. Available from: <http://data.kew.org/sid/> (August 2021) (last accessed: 11/08/2021)
2. Tavsanoğlu, Ç.; Pausas, J.G. A functional trait database for Mediterranean Basin plants. *Scientific Data* **2018** 5:180135.
3. Bastida, F.; Talavera, S.; Ortiz, P. L.; Arista, M. The interaction between *Cistaceae* and a highly specific seed-harvester ant in a Mediterranean scrubland. *Plant Biology* **2009**, 11(1), 46–56. <https://doi.org/10.1111/j.1438-8677.2008.00066.x>
4. Lengyel, S.; Gove, A. D.; Latimer, A. M.; Majer, J. D.; Dunn, R. R. Convergent evolution of seed dispersal by ants, and phylogeny and biogeography in flowering plants: A global survey. *Perspectives in Plant Ecology, Evolution and Systematics* **2010**, 12(1), 43–55. <https://doi.org/10.1016/j.ppees.2009.08.001>
5. Le Maitre, D. C.; Krug, R. M.; Hoffmann, J. H.; Gordon, A. J.; Mgidi, T. N. *Hakea sericea*: Development of a model of the impacts of biological control on population dynamics and rates of spread of an invasive species. *Ecological Modelling* **2008**, 212(3–4), 342–358. <https://doi.org/10.1016/j.ecolmodel.2007.11.011>
6. Herrera, C. M. Plant-vertebrate seed dispersal systems in the Mediterranean: Ecological, evolutionary, and historical determinants. *Annual Review of Ecology and Systematics* **1995**, 26(1), 705–727. <https://doi.org/10.1146/annurev.es.26.110195.003421>
7. Aguiar, F.C.; Fabião, A.M.; Bejarano, M.D.; Merritt, D.; Nilsson, C.; Martins, M.J. (2013) FLOWBASE – a riparian plant traitbase (<http://www.isa.ulisboa.pt/proj/flowbase/>). Centro de Estudos Florestais, Instituto Superior de Agronomia, Universidade de Lisboa, Lisboa, Portugal.
