# Supplementary material for: Riparian Ecological Infrastructures: Potential for Biodiversity-Related Ecosystem Services in Mediterranean Human-Dominated Landscapes
Source: MDPI journal article supplement (doi:10.3390/su131910508), 2021-09-22
Supplement: s1 [file s1]

**Table S5** - Scoring assigned to tree taxa for their suitability to pollination by medium-range dispersers (pollinators) based on pollination mode, with references.

| Tree taxa                            | Pollination mode  |                 | Score | References |
|--------------------------------------|-------------------|-----------------|-------|------------|
|                                      | Insect-pollinated | Wind-pollinated |       |            |
| <i>Acacia</i> sp.                    | Yes               |                 | 9     | [1]        |
| <i>Acer negundo</i> L.               | Yes               |                 | 9     | [2]        |
| <i>Alnus glutinosa</i> (L.) Gaertn.  | Yes               |                 | 0     | [1]        |
| <i>Casuarina cunninghamiana</i> Miq. |                   | Yes             | 0     |            |
| <i>Celtis australis</i> L.           |                   | Yes             | 0     |            |
| <i>Citrus limon</i> (L.) Burm. f.    | Yes               |                 | 10    | [3]        |
| <i>Cydonia oblonga</i> Mill.         | Yes               |                 | 10    | [1]        |
| <i>Eucalyptus globulus</i> Labill.   | Yes               |                 | 9     | [1]        |
| <i>Ficus carica</i> L.               | Yes               |                 | 1     | [4]        |
| <i>Fraxinus angustifolia</i> Vahl    | Yes               |                 | 1     | [1]        |
| <i>Juglans nigra</i> L.              |                   | Yes             | 0     |            |
| <i>Laurus nobilis</i> L.             | Yes               |                 | 9     | [5]        |
| <i>Ligustrum lucidum</i> W. T. Aiton | Yes               |                 | 1     | [1]        |
| <i>Olea europaea</i> L.              | Yes               |                 | 1     | [1]        |
| <i>Pinus pinaster</i> Aiton          |                   | Yes             | 0     | [1]        |
| <i>Pinus pinea</i> L.                |                   | Yes             | 0     | [1]        |
| <i>Populus nigra</i> L.              | Yes               |                 | 2     | [1]        |
| <i>Populus</i> spp.                  | Yes               |                 | 2     | [1]        |
| <i>Prunus domestica</i> L.           | Yes               |                 | 10    | [1]        |
| <i>Prunus spinosa</i> L.             | Yes               |                 | 10    | [1]        |
| <i>Pyrus</i> sp.                     | Yes               |                 | 10    | [1]        |
| <i>Quercus rotundifolia</i> Lam.     | Yes               |                 | 1     | [1]        |
| <i>Quercus</i> sp.                   | Yes               |                 | 1     | [1]        |
| <i>Quercus suber</i> L.              | Yes               |                 | 1     | [1]        |
| <i>Salix alba</i> L.                 | Yes               |                 | 2     | [1]        |
| <i>Salix atrocinerea</i> Brot.       | Yes               |                 | 2     | [1]        |
| <i>Salix salviifolia</i> Brot.       | Yes               |                 | 2     | [1]        |

**References:**

1. Santos, A.; Fernandes, M. R.; Aguiar, F. C.; Branco, M. R.; Ferreira, M. T. Effects of riverine landscape changes on pollination services: A case study on the River Minho, Portugal. *Ecological Indicators* **2018**, 89(February), 656–666. <https://doi.org/10.1016/j.ecolind.2018.02.036>
2. Williams, N. M. Restoration of Nontarget Species: Bee Communities and Pollination Function in Riparian Forests. *Restoration Ecology* **2011**, 19(4), 450–459. <https://doi.org/10.1111/j.1526-100X.2010.00707.x>
3. Layek, U.; Kundu, A.; Karmakar, P. Floral ecology, floral visitors and breeding system of Gandharaj lemon (*Citrus × limon* L. Osbeck). *Botanica Pacifica* **2020**, 9(2), 1–7. <https://doi.org/10.17581/bp.2020.09208>
4. Galil, J.; Neeman, G. Pollen Transfer and Pollination in the Common Fig (*Ficus carica* L.). *The New Phytologist* **1977**, 79(1), 193–205. Retrieved from <https://www.sid.ir/fa/journal/ViewPaper.aspx?ID=76014>
5. Pacini, E.; Sciannandrone, N.; Nepi, M. Floral biology of the dioecious species *Laurus nobilis* L. (*Lauraceae*). *Flora: Morphology, Distribution, Functional Ecology of Plants* **2014**, 209(3–4), 153–163. <https://doi.org/10.1016/j.flora.2014.02.001>
