# Supplementary material for: Riparian Ecological Infrastructures: Potential for Biodiversity-Related Ecosystem Services in Mediterranean Human-Dominated Landscapes
Source: MDPI journal article supplement (doi:10.3390/su131910508), 2021-09-22
Supplement: s1 [file s1]

**Table S13** - Plant-growth form classification, riparian classification, nativeness and relative occurrence of tree taxa (%) in Sampling Units located in the Intensive Agriculture (N=61), Extensive Agriculture (N=46) and Forest Production (N=44) landscapes.

| Taxa                                 | Raunkiaer classification | Riparian classification | Nativeness | Intensive Agriculture |          | Extensive Agriculture |          | Forest Production |          |
|--------------------------------------|--------------------------|-------------------------|------------|-----------------------|----------|-----------------------|----------|-------------------|----------|
|                                      |                          |                         |            | Present               | Dominant | Present               | Dominant | Present           | Dominant |
| <i>Acacia</i> sp.                    | Mesophanerophyte         | Facultative             | Non-native | 1.64                  |          | 2.17                  |          | 2.27              | 2.27     |
| <i>Acer negundo</i> L.               | Mesophanerophyte         | Facultative             | Non-native | 1.64                  |          |                       |          |                   |          |
| <i>Alnus glutinosa</i> (L.) Gaertn.  | Mesophanerophyte         | Obligate                | Native     | 3.28                  | 3.28     |                       |          |                   |          |
| <i>Casuarina cunninghamiana</i> Miq. | Megaphanerophyte         | Non-riparian            | Non-native |                       | 1.64     |                       |          |                   |          |
| <i>Celtis australis</i> L.           | Mesophanerophyte         | Facultative             | Native     |                       | 1.64     |                       |          |                   |          |
| <i>Citrus limon</i> (L.) Burm. f.    | Microphanerophyte        | Non-riparian            | Non-native |                       |          |                       |          | 2.27              |          |
| <i>Cydonia oblonga</i> Mill.         | Microphanerophyte        | Non-riparian            | Non-native | 1.64                  |          | 2.17                  |          |                   |          |
| <i>Eucalyptus globulus</i> Labill.   | Megaphanerophyte         | Non-riparian            | Non-native |                       |          | 2.17                  | 2.17     | 15.91             | 2.27     |
| <i>Ficus carica</i> L.               | Microphanerophyte        | Facultative             | Native     |                       | 4.92     |                       |          |                   |          |
| <i>Fraxinus angustifolia</i> Vahl    | Mesophanerophyte         | Preferential            | Native     | 18.03                 | 19.67    |                       |          |                   |          |
| <i>Juglans nigra</i> L.              | Mesophanerophyte         | Non-riparian            | Non-native | 1.64                  |          |                       |          |                   |          |
| <i>Laurus nobilis</i> L.             | Mesophanerophyte         | Preferential            | Native     | 1.64                  |          |                       |          |                   |          |
| <i>Ligustrum lucidum</i> W. T. Aiton | Microphanerophyte        | Non-riparian            | Non-native | 1.64                  |          |                       |          |                   |          |
| <i>Olea europaea</i> L.              | Microphanerophyte        | Non-riparian            | Native     | 1.64                  |          |                       |          | 2.27              |          |
| <i>Pinus pinaster</i> Aiton          | Macrophanerophyte        | Non-riparian            | Native     |                       |          | 43.48                 | 13.04    | 20.45             | 2.27     |
| <i>Pinus pinea</i> L.                | Mesophanerophyte         | Non-riparian            | Native     |                       |          | 4.35                  |          |                   |          |
| <i>Populus nigra</i> L.              | Mesophanerophyte         | Preferential            | Non-native | 8.20                  | 6.56     | 4.35                  | 2.17     |                   |          |
| <i>Populus</i> spp.                  | Mesophanerophyte         | Preferential            | Non-native | 4.92                  | 13.11    | 2.17                  | 2.17     |                   |          |
| <i>Prunus domestica</i> L.           | Microphanerophyte        | Non-riparian            | Non-native | 1.64                  |          |                       |          |                   |          |
| <i>Prunus spinosa</i> L.             | Microphanerophyte        | Non-riparian            | Native     |                       | 1.64     |                       |          |                   |          |
| <i>Pyrus</i> sp.                     | Microphanerophyte        | Non-riparian            | Native     |                       |          | 2.17                  |          |                   |          |
| <i>Quercus rotundifolia</i> Lam.     | Mesophanerophyte         | Non-riparian            | Native     |                       |          | 2.17                  |          |                   |          |
| <i>Quercus</i> sp.                   | Mesophanerophyte         | Non-riparian            | Native     |                       |          | 2.17                  |          |                   |          |
| <i>Quercus suber</i> L.              | Mesophanerophyte         | Non-riparian            | Native     | 1.64                  |          | 34.78                 | 15.22    | 40.91             | 34.09    |
| <i>Salix alba</i> L.                 | Mesophanerophyte         | Obligate                | Native     | 14.75                 | 16.39    | 2.17                  |          | 2.27              |          |
| <i>Salix atrocinerea</i> Brot.       | Mesophanerophyte         | Obligate                | Native     | 13.11                 | 4.92     | 19.57                 | 26.09    | 13.64             | 20.45    |
| <i>Salix salviifolia</i> Brot.       | Mesophanerophyte         | Obligate                | Native     | 8.20                  | 13.11    | 4.35                  | 15.22    | 2.27              | 2.27     |
| <i>Salix</i> sp.                     | Mesophanerophyte         | Obligate                | Native     | 9.84                  | 4.92     | 13.04                 |          | 6.82              | 2.27     |
